# Supplementary material for: Engineering a pH-responsive polymeric micelle co-loaded with paclitaxel and tretinoin for breast cancer therapy
Source: Research Square preprint supplement (doi:10.21203/rs.3.rs-3608767/v1), 2023-11-20
Supplement: Supplementary file 1 [file 17b73e4577eb17b29ebefdfe.xlsx]

## Sheet: Sheet1
Table S2. Combination index (CI) of different ratios of TPL and PTX combined on MDA-MB-231 cells at different affect fractions (fa).
fa		0.1	0.2	0.3	0.4	0.5	0.6	0.7	0.8	0.9
CI	TPL: PTX (1:2)	2.054	1.785	1.627	1.509	1.408	1.315	1.22	1.114	0.973
	TPL: PTX (1:4)	1.347	1.162	1.054	0.973	0.905	0.841	0.777	0.705	0.61
	TPL: PTX (1:6)	1.348	1.376	1.396	1.412	1.427	1.443	1.46	1.482	1.516
