# Supplementary material for: Engineering a pH-responsive polymeric micelle co-loaded with paclitaxel and tretinoin for breast cancer therapy
Source: Research Square preprint supplement (doi:10.21203/rs.3.rs-3608767/v1), 2023-11-20
Supplement: Supplementary file 2 [file 54d7757da775d1c0ef9fa666.xlsx]

## Sheet: Sheet1
Table S3. Results of statistical analysis of C6 uptake in MDA-MB-231 cells (n=3).
Time（h）		0.5	2	6
Fluorescence mean intensity	Free-C6	21.8 ± 0.95	37.4 ± 0.13	49.7 ± 0.56
	C6-PPMs	88.3 ± 0.82	118.3 ± 0.64	169.6 ± 0.74
