# Supplementary material for: Engineering a pH-responsive polymeric micelle co-loaded with paclitaxel and tretinoin for breast cancer therapy
Source: Research Square preprint supplement (doi:10.21203/rs.3.rs-3608767/v1), 2023-11-20
Supplement: Supplementary file 3 [file cb8cb62e4b6d91d38df2c51a.docx]

**Engineering a pH-responsive polymeric micelle co-loaded with paclitaxel and tretinoin for breast cancer therapy**

**Mengmeng Zhang a, d, 1, Na Ying a, d, 1, Jie Chenb，Liwen Wua, Huajie Liub,*, Shihua Luoc,** ***, Dongdong Zeng a,** **

a Shanghai University of Medicine & Health Sciences, Shanghai 201318, China

b Tongji University, Shanghai 200092, China

c Department of Traumatology, Rui Jin Hospital, School of Medicine, Shanghai Jiao Tong University, Shanghai 200025, China

d Shanghai University of Traditional Chinese Medicine, Shanghai 201203, China

**1 Co-first authors**

***Co-corresponding authors**

** **Corresponding author at:** Shanghai University of Medicine & Health Sciences, Shanghai 201318, China

**E-mail address:** zengdd@sumhs.edu.cn (D. Zeng), jqab@163.com (S. Luo), liuhuajie@tongji.edu.cn (H. Liu)


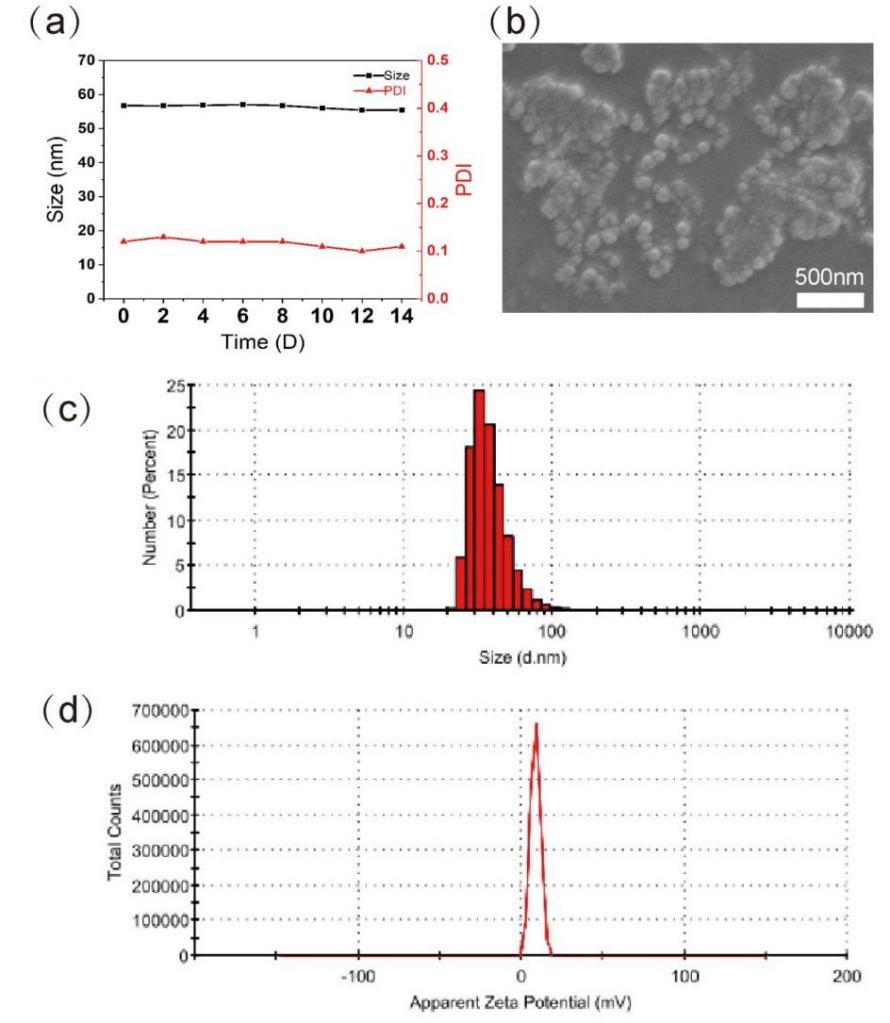


Figure S1.Characterization and biocompatibility of PPMs. (a) The particle size and PDI of PPMs in 14 days.

(b) SEM images, (c) Particle size distribution and (d) zeta potential of TPL/PTX-PPMs.

Table S1 Linear regression equations, correlation coefficients and IC50 values for different dosing groups

| Group | Linear regression equation | Correlation coefficient (r) | | IC50 |
| --- | --- | --- | --- | --- |
| TPL | Y=0.9208X-1.6025 | | 0.9919 | 55 |
| PTX | Y=0.8341X-1.047 | | 0.9733 | 18 |
| TPL: PTX (1:2) | Y=0.988X-0.8225 | | 0.9679 | 6.8 |
| TPL: PTX (1:4) | Y=0.9904X-0.3583 | | 0.9289 | 2.3 |
| TPL: PTX (1:6) | Y=0.82X-0.3263 | | 0.9284 | 2.5 |

Table S2. Combination index (CI) of different ratios of TPL and PTX combined on MDA-MB-231 cells at different affect fractions (fa).

| fa | | 0.1 | 0.2 | 0.3 | 0.4 | 0.5 | 0.6 | 0.7 | 0.8 | 0.9 |
| --- | --- | --- | --- | --- | --- | --- | --- | --- | --- | --- |
| CI | TPL: PTX  (1:2) | 2.054 | 1.785 | 1.627 | 1.509 | 1.408 | 1.315 | 1.22 | 1.114 | 0.973 |
| TPL: PTX  (1:4) | 1.347 | 1.162 | 1.054 | 0.973 | 0.905 | 0.841 | 0.777 | 0.705 | 0.61 |
| TPL: PTX  (1:6) | 1.348 | 1.376 | 1.396 | 1.412 | 1.427 | 1.443 | 1.46 | 1.482 | 1.516 |

Table S3. Results of statistical analysis of C6 uptake in MDA-MB-231 cells (n=3).

| Time（h） | | 0.5 | 2 | 6 |
| --- | --- | --- | --- | --- |
| Fluorescence mean intensity | Free-C6 | 21.8 ± 0.95 | 37.4 ± 0.13 | 49.7 ± 0.56 |
| C6-PPMs | 88.3 ± 0.82 | 118.3 ± 0.64 | 169.6 ± 0.74 |
