# Supplementary material for: Engineering a pH-responsive polymeric micelle co-loaded with paclitaxel and tretinoin for breast cancer therapy
Source: Research Square preprint supplement (doi:10.21203/rs.3.rs-3608767/v1), 2023-11-20
Supplement: Supplementary file 4 [file e5159b5267185867585b14de.xlsx]

## Sheet: Sheet1
Table S1 Linear regression equations, correlation coefficients and IC50 values for different dosing groups
Group	Linear regression equation	Correlation coefficient (r)	IC50
TPL	Y=0.9208X-1.6025	0.9919	55
PTX	Y=0.8341X-1.047	0.9733	18
TPL: PTX (1:2)	Y=0.988X-0.8225	0.9679	6.8
TPL: PTX (1:4)	Y=0.9904X-0.3583	0.9289	2.3
TPL: PTX (1:6)	Y=0.82X-0.3263	0.9284	2.5
